# Supplementary material for: Co-circulation of both low and highly pathogenic avian influenza H5 viruses in current poultry epidemics in Taiwan
Source: PubMed Central journal article supplement — Virus Evol. 2020 Jun 30;6(1):veaa037. doi: 10.1093/ve/veaa037 (PMC7326300; doi:10.1093/ve/veaa037), 2020-06-30
Supplement: veaa037_supplementary_data.pdf [file veaa037_supplementary_data.pdf]

# **Co-circulation of both low and highly pathogenic H5 avian influenza viruses in current epidemics in Taiwan**

## **Supplementary Data**

### **Validation of the sequencing approach**

We evaluated our sequencing approach by first testing cultured viruses, PR8 (H1N1) and A/Ck/TW/0702/2013 (H6N1). Comparisons of the two viruses' sequences generated by our pipeline with sequences generated by Sanger's method showed that there were ten and zero Single nucleotide variants (SNV), respectively, in whole genomes (~13000 bases) (Supplementary Table 3). Secondly, crude SNV calling from piled-up reads using Samtools v1.9, were compared with SNVs detected by Nanopolish (described in Methods). Since most samples possessed over 100x depth of coverage in each gene, we expected the two methods to produce a similar outcome. As shown in Supplementary Table 3, differences between SNVs found by the two methods were all below 20 among the coding regions in each sample. Third, a number of positions with minor variants, which have support fractions  $> 0.3$  and  $< 0.6$ , were reported for each sample, demonstrating little contamination (Supplementary Table 1). Finally, we repeated the sequencing procedure from RNA extraction from A1 sample, where A/chicken/Taiwan/A1/2019 (H5N2) was identified, to compare results from libraries containing different read depths (Supplementary Table 3 & Supplementary Figure 6). The result shows only one difference in SNV between these two conducts (Supplementary Table 3).

**Supplementary Table 1.** Summary of the hosts and subtypes of avian influenza outbreaks in Taiwan, 2015–2018.

|                      | 2015        | 2016       | 2017        | 2018       |
|----------------------|-------------|------------|-------------|------------|
| No of outbreak farms | 944         | 37         | 182         | 98         |
| Chicken              | 145         | 18         | 105         | 33         |
| Duck                 | 98          | 4          | 55          | 46         |
| Goose                | 681         | 14         | 13          | 12         |
| Turkey               | 18          | 1          | 9           | 7          |
| Mixed                | 2           | 0          | 0           | 0          |
| LPAI                 | 60(100%)    | 5(100%)    | 19(100%)    | 26(100%)   |
| H5N2                 | 53(88.3)    | 2(40%)     | 12(63.2%)   | 25(96.2%)  |
| H6N1                 | 1(1.7%)     | 0(0%)      | 0(0%)       | 0(0%)      |
| H5N6                 | 0(0%)       | 0(0%)      | 2(10.5%)    | 1(3.8%)    |
| Non-typing           | 6(10%)      | 3(60%)     | 5(26.3%)    | 0(0%)      |
| HPAI                 | 944(100%)   | 37(100%)   | 182(100%)   | 98(100%)   |
| H5N2                 | 540 (57.2%) | 25 (67.6%) | 150 (82.4%) | 93 (94.9%) |
| H5N8                 | 232 (24.6%) | 4 (10.8%)  | 10 (5.5%)   | 1 (1.0%)   |
| H5N3                 | 21 (2.2%)   | 0 (0%)     | 0 (0%)      | 0 (0%)     |
| H5N6                 | 0 (0%)      | 0 (0%)     | 11 (6.0%)   | 0 (0%)     |
| Mixed H5N2 and H5N8  | 68 (7.2%)   | 0 (0%)     | 3 (1.6%)    | 0 (0%)     |
| Mixed H5N2 and H5N3  | 2 (0.21%)   | 0 (0%)     | 0 (0%)      | 0 (0%)     |
| Mixed H5N2 and H5N6  | 0 (0%)      | 0 (0%)     | 1 (0.6%)    | 0 (0%)     |
| Non-subtyping        | 81 (8.6%)   | 8 (21.6%)  | 7 (3.9%)    | 4 (4.1%)   |

**Supplementary Table 2.** List of database accession numbers from GenBank and GISAID

used in the genetic analyses for each gene phylogeny.

| PB2        | PB1        | PA         | HA        | NP         | NA        | MP         | NS         |
|------------|------------|------------|-----------|------------|-----------|------------|------------|
| KT327371   | KT327372   | KT327373   | EPI860712 | KT327374   | AY573918  | KT327376   | KT327377   |
| EPI588965  | EPI588966  | EPI588967  | MG965144  | EPI588969  | KF193388  | EPI588971  | EPI588972  |
| KC535016   | KC535015   | KC535014   | MG965800  | KC535012   | AB507266  | KC535011   | KC535013   |
| AB507255   | AB507256   | AB507257   | MG964808  | AB507258   | KJ162590  | AB507259   | AB507260   |
| KF193393   | KF193392   | KF193391   | KX838899  | KF193389   | KF193396  | KF193387   | KF193390   |
| AB507261   | AB507262   | AB507263   | KP307957  | AB507265   | KR137688  | AB507267   | AB507268   |
| KJ162585   | KJ162586   | KJ162587   | MG964760  | KJ162589   | KR137680  | KJ162591   | KJ162592   |
| KF193401   | KF193400   | KF193399   | EPI586534 | KF193397   | EPI961924 | KF193395   | KF193398   |
| KR137683   | KR137684   | KR137685   | EPI587521 | KR137687   | KU646895  | KR137689   | KR137690   |
| KR137675   | KR137676   | KR137677   | KU201752  | KR137679   | KJ162806  | KR137681   | KR137682   |
| EPI961919  | EPI961920  | EPI961921  | EPI953870 | EPI961923  | KJ162718  | EPI961925  | EPI961926  |
| KU646890   | KU646891   | KU646892   | KR150901  | KU646894   | KC785067  | KU646896   | KU646897   |
| EPI588973  | EPI588974  | EPI588975  | LC026477  | EPI588977  | KP792310  | EPI588979  | EPI588980  |
| EPI961928  | EPI961930  | EPI961931  | EPI573638 | EPI961934  | MK592423  | EPI961938  | EPI961939  |
| KJ162801   | KJ162802   | KJ162803   | EPI553208 | KJ162805   | EPI866809 | KJ162807   | KJ162808   |
| EPI915867  | EPI915868  | EPI915869  | EPI573208 | EPI915871  | CY146574  | EPI915873  | EPI915874  |
| KJ162713   | KJ162714   | KJ162715   | KJ509036  | KJ162717   | EPI866785 | KJ162719   | KJ162720   |
| KC785066   | KC785065   | KC785068   | EPI547673 | KC785071   | EPI855811 | KC785064   | KC785069   |
| KP792305   | KP792306   | KP792307   | EPI555126 | KP792309   | GU052700  | KP792311   | KP792312   |
| KT327385   | KT327386   | KT327387   | EPI550848 | KT327388   | CY005833  | KT327390   | KT327391   |
| KT388465   | KT388466   | KT388467   | EPI553349 | KT388469   | JX570864  | KT388471   | KT388472   |
| KU646930   | KU646931   | KU646932   | EPI573196 | KU646934   | KU646863  | KU646936   | KU646937   |
| KT388449   | KT388450   | KT388451   | KJ756630  | KT388453   | GU050732  | KT388455   | KT388456   |
| KU646938   | KU646939   | KU646940   | EPI837583 | KU646942   | MH130172  | KU646944   | KU646945   |
| EPI1119037 | EPI1119048 | EPI1119057 | EPI837564 | EPI1119072 |           | EPI1119074 | EPI1119075 |
| EPI866831  | EPI866832  | EPI866830  | EPI837584 | EPI866827  |           | EPI866829  | EPI866828  |
| MK592418   | MK592419   | MK592420   | KJ511812  | MK592422   |           | MK592424   | MK592425   |
| MN208016   | MN208017   | MN208014   | KJ413842  | MN208011   |           | MN208010   | MN208015   |
| MF693922   | MF694063   | MF694032   | KJ509164  | MF694210   |           | MF694049   | MF693947   |
| MN171423   | MN171424   | MN171425   | KJ508988  | MN171427   |           | MN171429   | MN171430   |
| MK978901   | MK978902   | MK978903   | KT936689  | MK978905   |           | MK978907   | MK978908   |
| EPI855652  | EPI855653  | EPI855651  | EPI573199 | EPI855648  |           | EPI855650  | EPI855649  |
| EPI866807  | EPI866808  | EPI866806  | KJ509100  | EPI866803  |           | EPI866805  | EPI866804  |
| EPI867653  | EPI867654  | EPI867652  | EPI573230 | EPI867649  |           | EPI867651  | EPI867650  |
| MN378542   | KX949434   | KX949435   | EPI837541 | MN378546   |           | KX949439   | KX949440   |
| MH579386   | MN378543   | MN378544   | EPI888267 | MH579390   |           | MN378548   | MN378549   |
| MH579402   | MH579387   | MH579388   | EPI573229 | MH579406   |           | MH579392   | MH579393   |
| EPI1139887 | MH579403   | MH579404   | EPI837563 | EPI1139891 |           | MH579408   | MH579409   |
| MG198953   | EPI1139888 | EPI1139889 | EPI888264 | MG198937   |           | EPI1139893 | EPI1139894 |
| LC339728   | MG198949   | MG198945   | EPI573209 | LC339732   |           | MG198929   | MG198941   |
| MK592578   | LC339729   | LC339730   | EPI573198 | MK592582   |           | LC339734   | LC339735   |

|            |            |            |            |            |            |            |
|------------|------------|------------|------------|------------|------------|------------|
| EPI855748  | MK592579   | MK592580   | EPI573206  | EPI855744  | MK592584   | MK592585   |
| KJ200828   | EPI855751  | EPI855747  | EPI573205  | KJ200824   | EPI855746  | EPI855745  |
| EPI1333694 | KJ200827   | KJ200826   | KJ508948   | EPI1333697 | KJ200822   | KJ200825   |
| MH592159   | EPI1333695 | EPI1333696 | KJ508956   | MH592283   | EPI1333698 | EPI1333699 |
| EPI1226720 | MH592190   | MH592221   | KJ756632   | EPI1226716 | MH592345   | MH592376   |
| KJ162825   | EPI1226721 | EPI1226719 | KJ508932   | KJ162829   | EPI1226718 | EPI1226717 |
| KC785037   | KJ162826   | KJ162827   | EPI573197  | KC785042   | KJ162831   | KJ162832   |
| DQ376896   | KC785036   | KC785039   | KY415621   | DQ376752   | KC785035   | KC785040   |
| KF357824   | DQ376860   | DQ376824   | EPI659639  | KF357839   | DQ376679   | DQ376788   |
| KY635469   | KF357827   | KF357832   | EPI659631  | KY635523   | KF357849   | KF357835   |
| MN171439   | KY635519   | KY635624   | EPI659919  | MN171443   | KY635603   | KY635444   |
| CY146569   | MN171440   | MN171441   | KY056286   | CY146573   | MN171445   | MN171446   |
| EPI866783  | CY146570   | CY146571   | MF620123   | EPI866779  | CY146575   | CY146576   |
| KJ907716   | EPI866784  | EPI866782  | EPI1055332 | KJ907720   | EPI866781  | EPI866780  |
| EPI866917  | KJ907717   | KJ907718   | KY056288   | EPI866913  | KJ907722   | KJ907723   |
| LC042048   | EPI866918  | EPI866916  | MH685179   | LC042051   | EPI866915  | EPI866914  |
| EPI855808  | LC042049   | LC042050   | KX523694   | EPI855800  | LC042053   | LC042054   |
| KM267857   | EPI855809  | EPI855807  | KP732639   | KM267853   | EPI855804  | EPI855802  |
| EPI855931  | KM267856   | KM267855   | MG965280   | EPI855924  | KM267851   | KM267854   |
| KJ028471   | EPI855932  | EPI855929  | MG965216   | KJ028474   | EPI855927  | EPI855926  |
| EPI573635  | KJ028472   | KJ028473   | MG965152   | EPI573639  | KJ028475   | KJ028476   |
| EPI860645  | EPI573636  | EPI573637  | MG964688   | EPI860641  | EPI573641  | EPI573642  |
| KF042281   | EPI860646  | EPI860644  | KR234022   | KF042285   | EPI860643  | EPI860642  |
| DQ095752   | KF042282   | KF042283   | KY342034   | DQ095672   | KF042287   | KF042288   |
| EPI1123332 | DQ095732   | DQ095712   | KX351771   | EPI1123336 | DQ095632   | DQ095692   |
| EPI1064656 | EPI1123333 | EPI1123334 | KU201943   | EPI1064659 | EPI1123338 | EPI1123339 |
| DQ376904   | GU052704   | GU052703   | KR234014   | DQ376760   | GU052699   | GU052663   |
| JX570867   | GU052665   | GU052664   | MG964776   | JX570870   | GU052660   | EPI1064662 |
|            | EPI1064657 | EPI1064599 | EPI586526  |            | EPI1064661 | DQ376796   |
|            | DQ376868   | DQ376832   | MG965072   |            | DQ376688   | JX570869   |
|            | JX570866   | JX570865   | KU201816   |            | JX570868   |            |
|            |            |            | KR233990   |            |            |            |
|            |            |            | KR150909   |            |            |            |
|            |            |            | EPI861000  |            |            |            |
|            |            |            | KU201856   |            |            |            |
|            |            |            | KU201744   |            |            |            |
|            |            |            | EPI860648  |            |            |            |
|            |            |            | EPI691836  |            |            |            |
|            |            |            | EPI573239  |            |            |            |
|            |            |            | EPI687239  |            |            |            |
|            |            |            | EPI576384  |            |            |            |
|            |            |            | EPI573203  |            |            |            |
|            |            |            | EPI573195  |            |            |            |
|            |            |            | KJ508900   |            |            |            |
|            |            |            | KJ509148   |            |            |            |
|            |            |            | EPI573200  |            |            |            |

|            |
|------------|
| KJ509076   |
| EPI662648  |
| EPI837545  |
| EPI837550  |
| KJ756624   |
| EPI888269  |
| EPI837543  |
| EPI573224  |
| EPI573222  |
| EPI837569  |
| EPI888266  |
| EPI573216  |
| EPI573213  |
| KJ756621   |
| KJ509044   |
| KJ756623   |
| KJ509132   |
| KX602689   |
| EPI1055335 |
| KP714481   |
| EPI588968  |
| EPI961922  |
| KU646893   |
| EPI588976  |
| EPI961933  |
| KP714479   |
| KT388468   |
| KU646933   |
| KT388452   |
| KU646941   |
| KM368298   |
| KM368295   |
| KM368308   |
| KM368307   |
| KM368306   |
| KM368283   |
| KM368290   |
| KM368297   |
| KM455913   |
| KM368276   |
| KM455950   |
| KM368286   |
| KM455945   |
| KM368305   |
| KM455951   |
| KM368278   |

KM368277  
KM368292  
KM455954  
KM368300  
KM455889  
KM368275  
KM368284  
KM368274  
KM455953  
KJ729343  
KM368294  
KM455921  
KM368304  
KM368282  
KM455952  
KM368281  
KM368301  
KM368288  
KM368287  
KM455937  
KM455929  
KM368296  
KM657867  
GU050159  
KM368303  
KM455897  
KM368280  
KM368302  
KM368285  
KM368289  
KM368291  
KM368279  
GU052636  
GU186557  
GU052795  
EU099401  
EU099400  
KM455881  
KM368299  
DQ256383  
FJ864690  
CY014717  
GU052675  
CY006040  
AB558474  
U79448

|          |
|----------|
| GU052763 |
| GU052651 |
| FJ610108 |
| GU186565 |
| GU052659 |
| FJ610094 |
| GU052667 |
| AB558473 |
| GU052588 |
| GU052596 |
| GU052690 |
| GU186573 |
| KR137670 |
| KR137686 |
| KR137654 |
| KR137662 |
| KR137678 |
| KR137702 |
| KY989967 |
| KF193394 |
| KJ720208 |
| KR137710 |
| KJ162700 |
| KJ162692 |
| KJ162660 |
| KJ162612 |
| KJ162668 |
| KJ162708 |
| KJ162588 |
| AB507264 |
| KJ162620 |
| KF193386 |
| KY989969 |
| AY573917 |

**Supplementary Table 3.** Sequencing statistics.

| Sample ID                           | Serotype | Host    | Mapped reads | Mean read length (bp) | SNV† | Crude SNV‡ | Minor variant | Min. coverage (depth)§                 |
|-------------------------------------|----------|---------|--------------|-----------------------|------|------------|---------------|----------------------------------------|
| TEST(PR8)                           | H1N1     | -       | 7812         | 697                   | 10   | 13         | 0             | 132/65/79/189/246/332/737/965          |
| TEST(0702)                          | H6N1     | -       | 12967        | 772                   | 0    | 0          | 0             | 139/66/117/316/582/405/1632/1482       |
| A1 (chicken/Taiwan/A1/2019)         | H5N2     | chicken | 11028        | 1070                  | 307  | 322        | 5             | 348/183/509/610/892/626/1090/1481      |
| A1 (chicken/Taiwan/A1/2019)*        | H5N2     | chicken | 429268       | 605                   | 306  | 323        | 6             | 788/230/948/4989/8452/9284/32647/25084 |
| A3 (chicken/Taiwan/A3/2019)         | H5N2     | chicken | 16919        | 871                   | 215  | 219        | 1             | 234/118/352/202/514/864/2443/4426      |
| A4 (chicken/Taiwan/A4/2019)         | H5N2     | chicken | 9501         | 1202                  | 212  | 219        | 6             | 553/349/333/552/595/998/1507/1798      |
| A5 (chicken/Taiwan/A5/2019)         | H5N2     | chicken | 51146        | 793                   | 216  | 219        | 0             | 786/277/670/524/1983/3199/5478/4228    |
| D2 (chicken/Taiwan/D2/2019)         | H5N2     | chicken | 2406         | 1225                  | 230  | 243        | 11            | 126/86/122/190/189/228/284/433         |
| D9 (chicken/Taiwan/D9/2019)         | H5N2     | chicken | 25792        | 1226                  | 231  | 242        | 9             | 119/338/1521/1097/2264/4593/6587/5081  |
| WB2477 (pintail/Taiwan/WB2477/2017) | H6N2     | pintail | 2627         | 1122                  | 145  | 156        | 2             | 79/40/38/76/178/215/425/577            |
| WB2478 (pintail/Taiwan/WB2478/2017) | H1N3     | pintail | 54972        | 1081                  | 139  | 142        | 1             | 2445/841/2278/3240/555/3223/7621/15259 |

\*Another library constructed from the same sample as A1

†Single nucleotide variant detected by Nanopolish

‡Single nucleotide variant called directed from aligned BAM files

§Minimum coverage in each gene segment (ordered as PB2/PB1/PA/HA/NP/NA/MP/NS)



H5

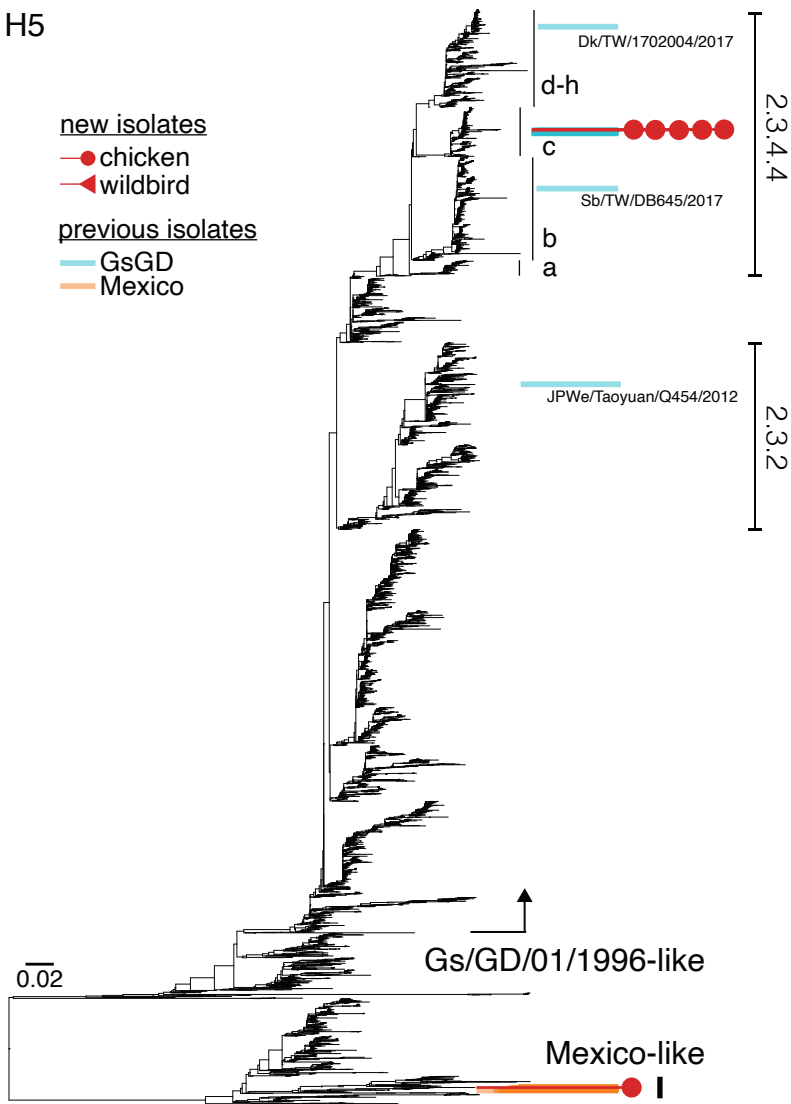

Supplementary figure S1.

Maximum likelihood (ML) tree of H5 hemagglutinin genes.

Previously identified Gs/GD and Mexico lineage H5 viruses from Taiwan are highlighted with blue and orange bars, respectively, next to the tree. Virus names of three Gs/GD viruses isolated in Taiwan but not belonging to 2.3.4.4c clade are also shown. Viruses isolated in this study are indicated by red lines with circles (chicken) or triangles (wild bird) used to indicate virus host group. Mexico H5N2 and Gs/GD lineage viruses clades 2.3.4.4 (2.3.4.4a-2.3.4.4h) are marked on the tree. Scale bar represents 0.02 substitutions per nucleotide site. TW, Taiwan; Dk, duck; Sb, spoonbill; JPWe, Japanese white eye.

A

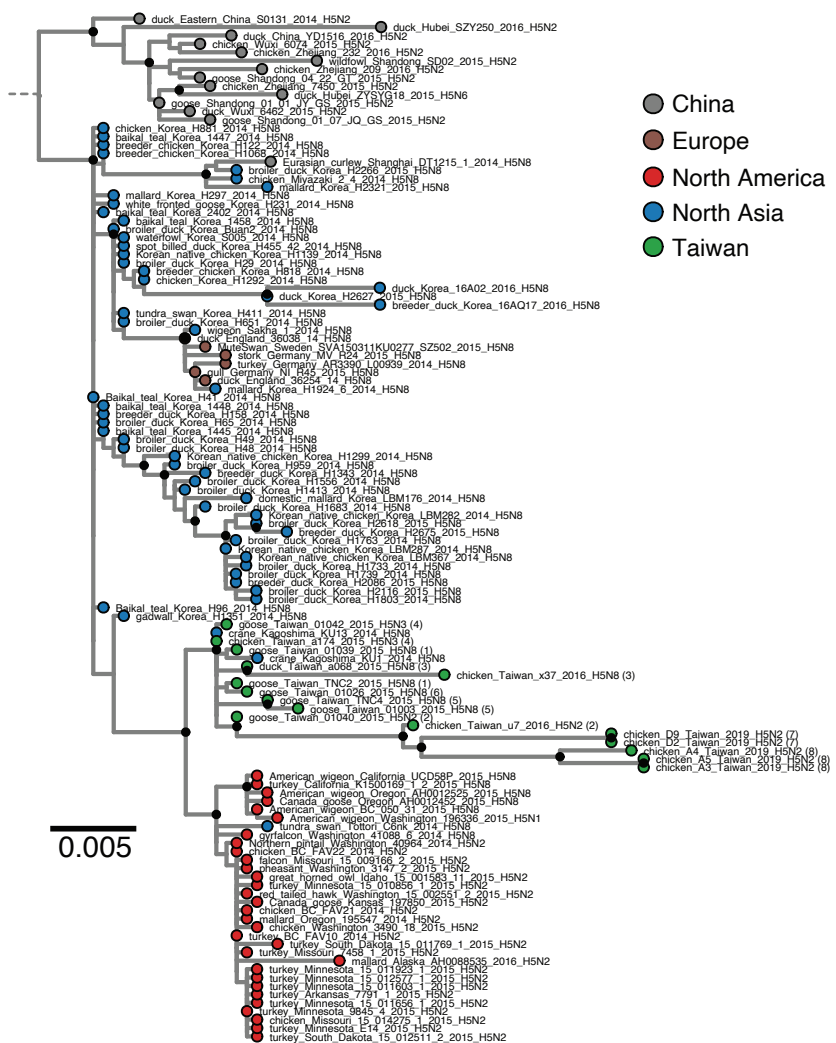

B

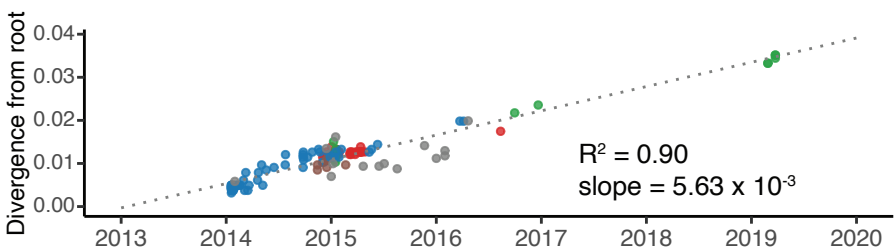

Supplementary figure S2.

Maximum likelihood (ML) tree and root-to-tip regression

of Gs/GD clade 2.3.4.4c viruses. (A) The ML tree was reconstructed by the same alignment as Figure 1 (n=122) with tips colored according to collection location. Bootstrap supporting values >70% are indicated at nodes by black circles. Genotypes (numbered 1-8) are appended to tip labels of viruses isolated in Taiwan. (B) Linear regression of collection dates against genetic distances to root of the ML tree shown in (A). Dots are colored according to the same scheme as (A). Scale bar represents 0.005 substitutions per nucleotide site.

Supplementary figure S2.

Maximum likelihood (ML) tree and root-to-tip regression of Gs/GD clade 2.3.4.4c viruses. (A) The ML tree was reconstructed by the same alignment as Figure 1 (n=122) with tips colored according to collection location. Bootstrap supporting values >70% are indicated at nodes by black circles. Genotypes (numbered 1-8) are appended to tip labels of viruses isolated in Taiwan. (B) Linear regression of collection dates against genetic distances to root of the ML tree shown in (A). Dots are colored according to the same scheme as (A). Scale bar represents 0.005 substitutions per nucleotide site.

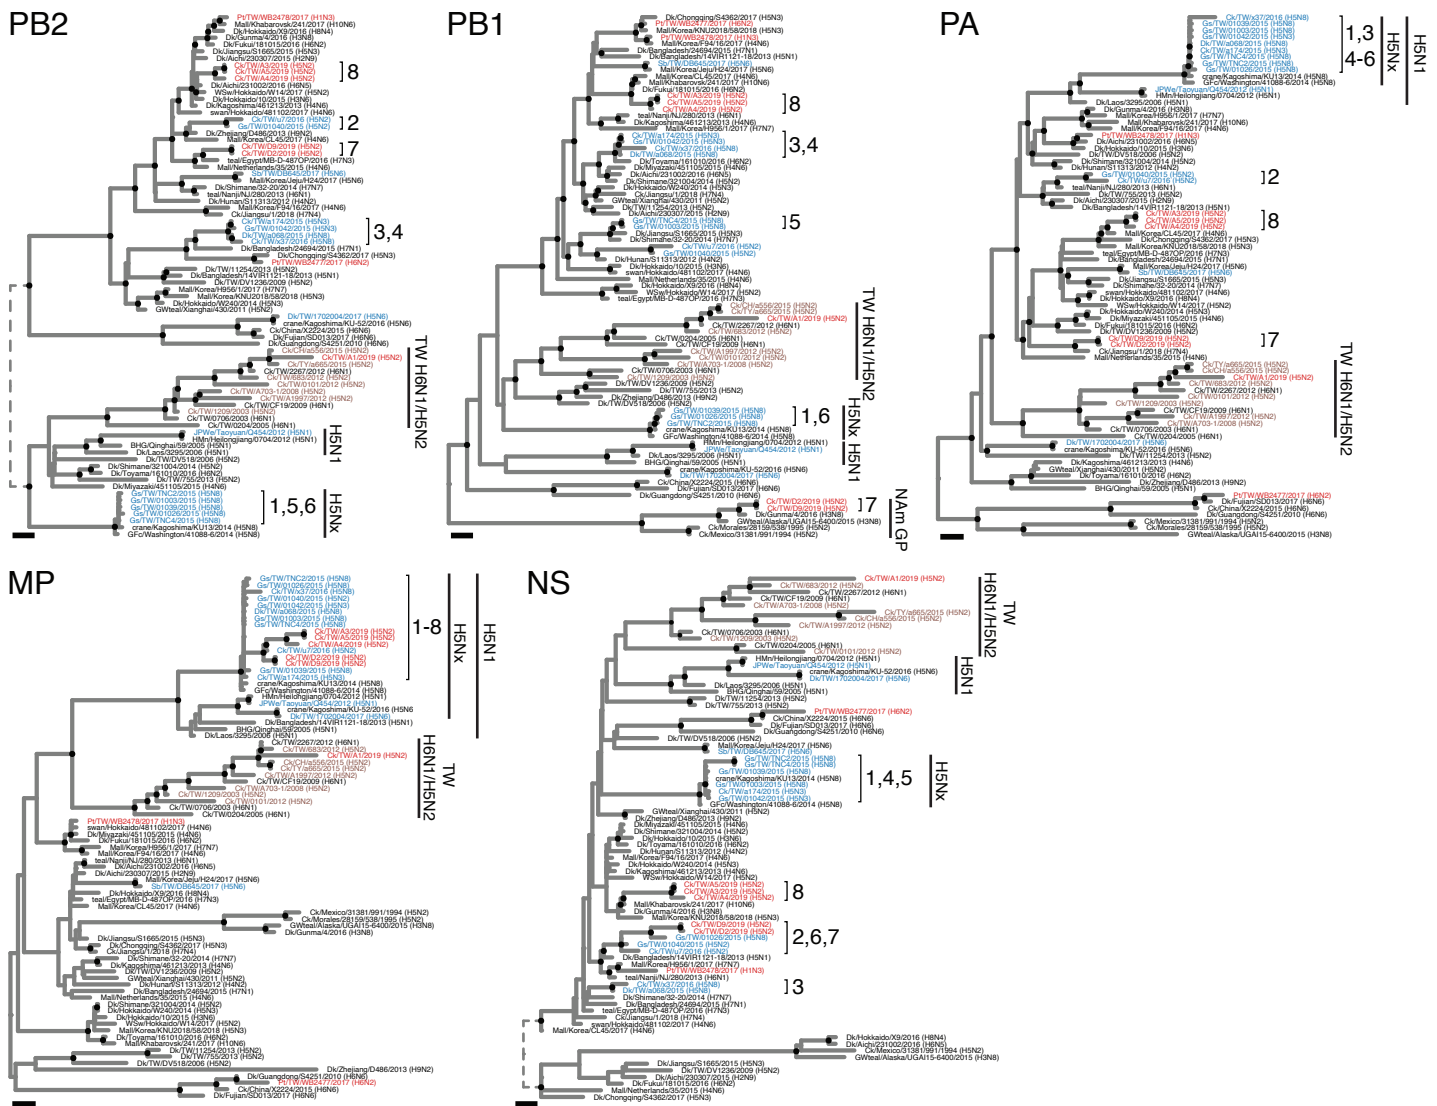

## Supplementary figure S3.

Phylogeny of internal genes of H5N2 viruses isolated in this study.

Maximum likelihood (ML) trees were reconstructed by PB2, PB1, PA, MP and NS genes of H5 viruses identified in Taiwan and relevant reference strains.

Viruses isolated in this study are labeled in red, whereas tip labels in blue and brown represent previously identified Taiwanese Gs/GD and Mexico-like H5 viruses, respectively. Genotypes in the clade 2.3.4.4c (numbered 1-8) and major lineages are also indicated. Bootstrap supporting values >70% are highlighted at nodes by black circles. Long branches at the tree root were omitted and shown as shorter dashed branches. Scale bars represent 0.001 substitutions per nucleotide site. Korea, South Korea; TW, Taiwan; Ck, chicken; Dk, duck; Gs, goose; Pt, pintail; BHG, bar headed goose; teal, common teal; GWteal, green winged teal; GFc, gyrfalcon; HMn, hill myna, JPWe, Japanese white eye; Mall, mallard; Sb, spoonbill; WSw, whooper swans.

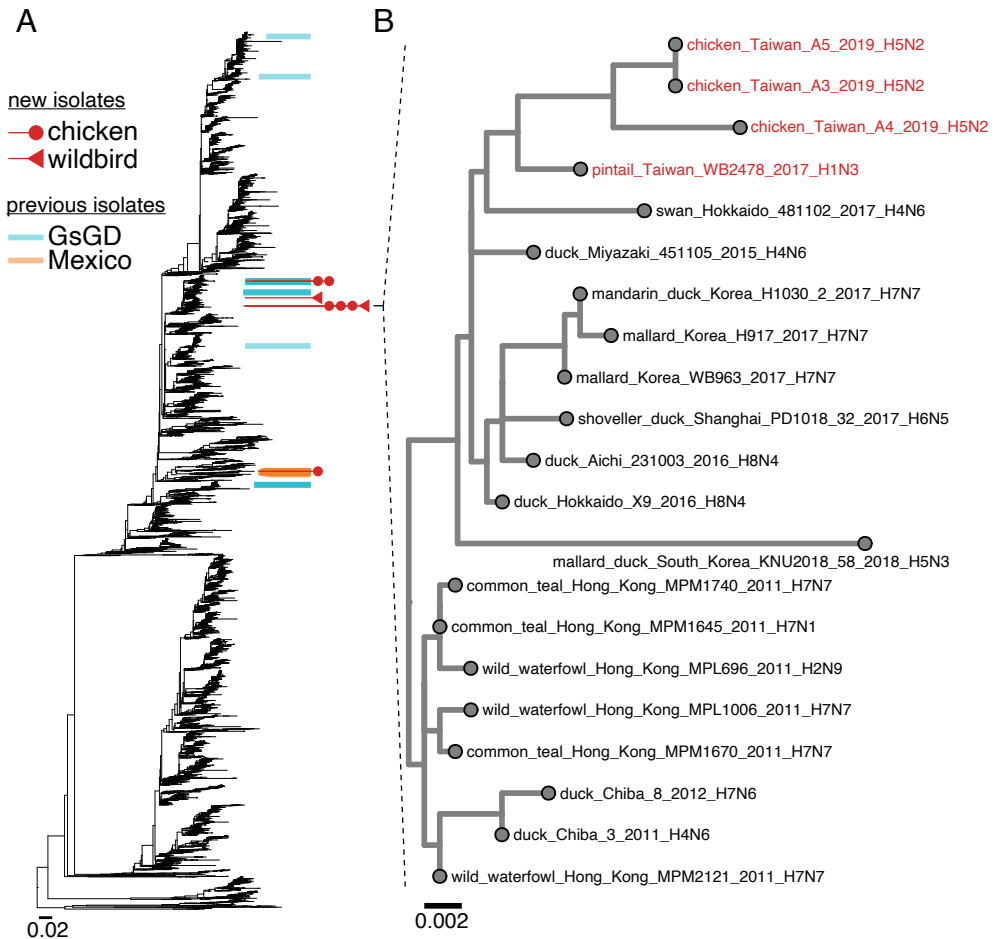

Supplementary figure S4.

Maximum likelihood (ML) tree of NP genes of avian influenza viruses. (A) Previously identified Gs/GD and Mexico lineage H5 viruses from Taiwan are highlighted with blue and orange bars, respectively, next to the tree. Viruses isolated in this study are indicated by red lines with circles (chicken) or triangles (wild bird) head. (B) A Zoomed-in version of the ML tree showing NP genes of genotype 8 clade 2.3.4.4c viruses are most phylogenetically related to the NP gene of *A/pintail/Taiwan/WB2478/2017*. Viruses found in this study are labeled in red. Scale bars represent 0.02 (A) and 0.002 (B) substitutions per nucleotide site.

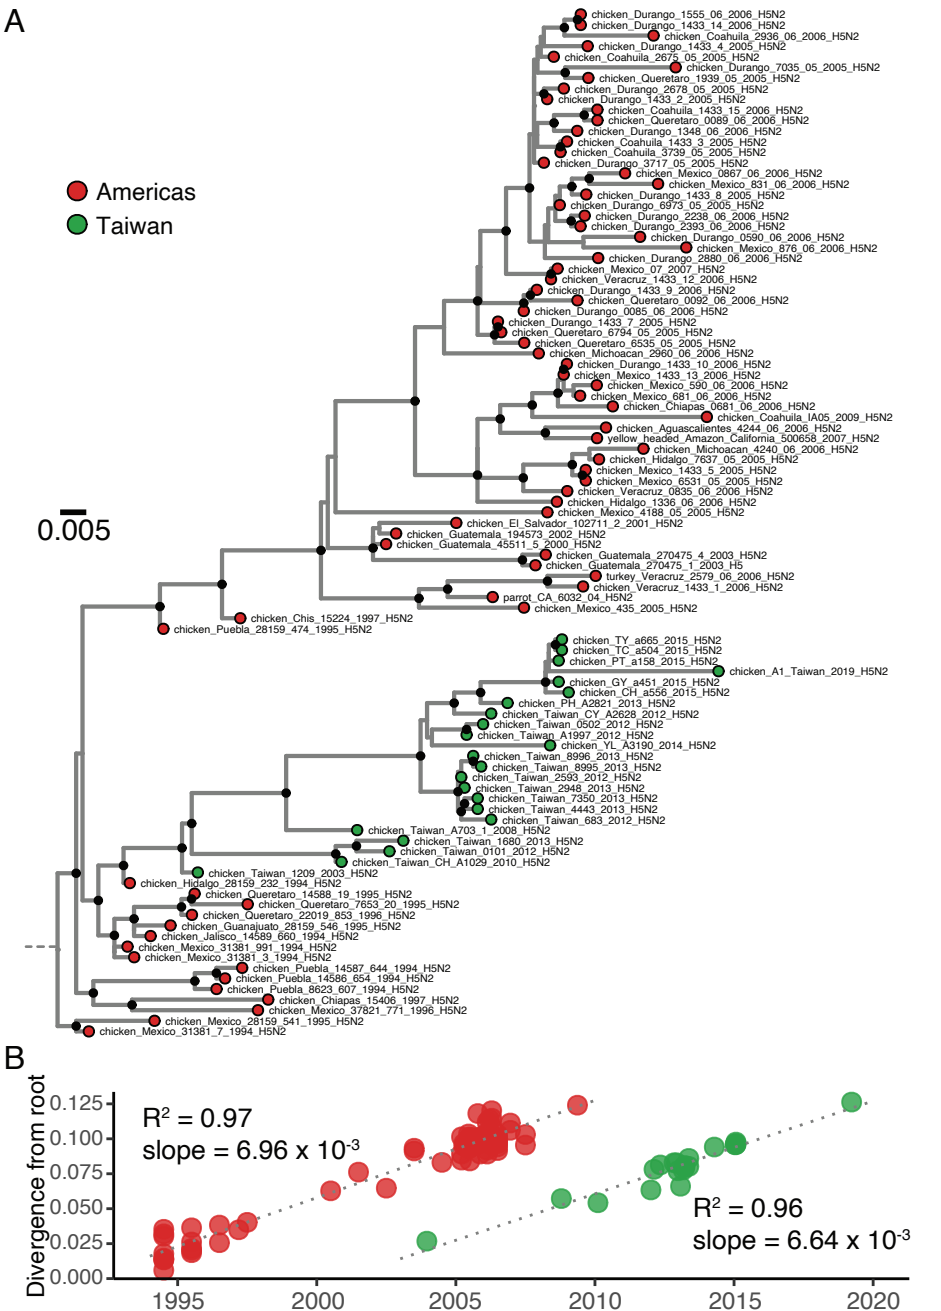

## Supplementary figure S5.

Maximum likelihood (ML) tree and root-to-tip regression of Mexico lineage H5N2 viruses. (A) The ML tree was reconstructed using Taiwanese isolates ( $n=23$ , identical to the sequences used in Figure 3) combined with viruses from the ancestral lineage isolated in Mexico, Guatemala, El Salvador and USA ( $n=74$ ). Bootstrap supporting values  $> 70\%$  are indicated at nodes by black circles. (B) Linear regression was built separately for viruses isolated in Taiwan and viruses in North Americas by plotting collection dates against genetic distances to root of the ML tree (A). Tip labels (A) and the dots in (B) share the same color scheme. Scale bar represents 0.005 substitutions per nucleotide site.

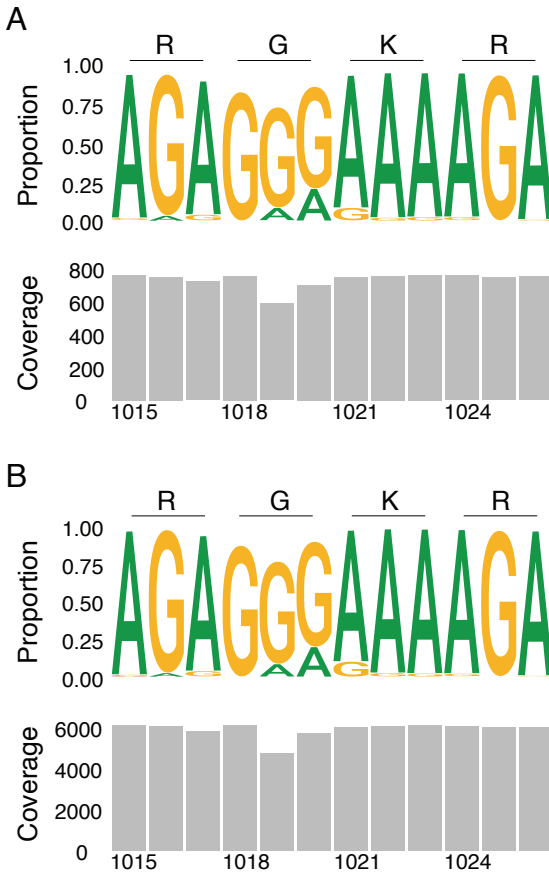

Supplementary figure S6.

HA cleavage site of the Mexican-like H5N2 virus isolated in this study. Sequence logos and depth of coverage (number of reads mapped to the reference) were derived from two independently prepared libraries using A1 sample, where A/chicken/Taiwan/A1/2019 (H5N2) was identified (Technical Appendix Table 2). 12 nucleotide positions containing residues -4 to -1 at the cleavage site are shown (nucleotide positions 1015-1026), with putative amino acids indicated at the top.
